# Supplementary material
Source: publisher figshare collection journal article supplement (https://karger.figshare.com/ndownloader/files/12480977)

## Supplementary figures

### **LOC101930370/miR-1471 axis modulates the Hedgehog signaling pathway in breast cancer**

Xin Liu<sup>1#</sup>, Tong Zhao<sup>1#</sup>, Xue Bai<sup>1</sup>, Mingqi Li<sup>1</sup>, Jingli Ren<sup>2</sup>, Mengxue Wang<sup>1</sup>, Ranchen Xu<sup>1</sup>, Shuqian Zhang<sup>1</sup>, Huimin Li<sup>1</sup>, Yingying Hu<sup>3</sup>, Liangjun Xie<sup>1</sup>, Ying Zhang<sup>1</sup>, Lida Yang<sup>1</sup>, Chaoqi Yan<sup>4\*</sup>, Yong Zhang<sup>1,5\*</sup>

<sup>1</sup>Department of Pharmacology (the State-Province Key Laboratories of Biomedicine-Pharmaceutics of China, Key Laboratory of Cardiovascular Research, Ministry of Education), College of Pharmacy, Harbin Medical University, Harbin 150086, China;

<sup>2</sup>Department of pharmacology, Luohe Medical College, Luohe 462000, China;

<sup>3</sup>Department of Pharmacy, The First Affiliated Hospital of Harbin Medical University, Harbin 150086, China;

<sup>4</sup>Department of Breast Surgery, The Second Affiliated Hospital of Harbin Medical University, Harbin 150086, China;

<sup>5</sup>Institute of Metabolic Disease, Heilongjiang Academy of Medical Science, Harbin 150086, China;

#Authors contributed equally to this study.

\*Corresponding authors:

Professor Yong Zhang; E-mail: hmuzhangyong@hotmail.com.

Professor Chaoqi Yan; Email: yanchaoqi2002@163.com

## Supplementary figures

### Supplementary Fig. 1

LOC101930370 expression levels in four breast cancer cell lines. n=3 batches of cells.

The data are presented as the mean±S.E.M. \* $p$ <0.05 \*\*\* $p$ <0.001 vs. Control.

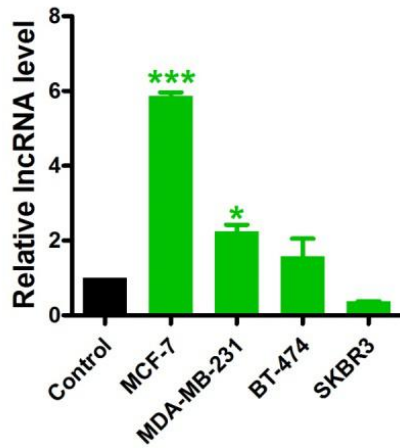

### Supplementary Fig. 2

Quantification and statistical analysis of the SHH and Gli-1 immunostaining staining.

n=3 batches of cells. The data are presented as the mean±S.E.M. \*\*\* $p$ <0.001 vs.

Control.

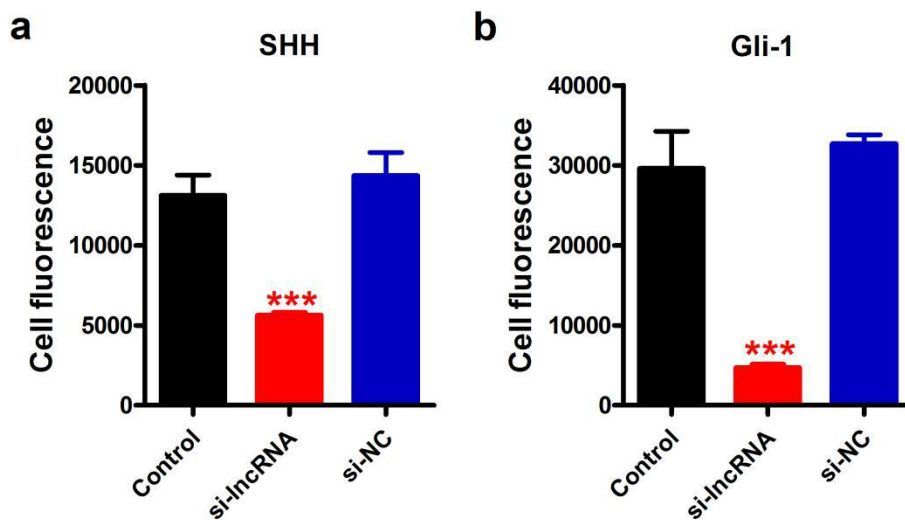

### Supplementary Fig. 3

SHH concentrations in cell culture medium. n=3 batches of culture supernatants. The data are presented as the mean±S.E.M. \*\*\* $p$ <0.001 vs. Control.

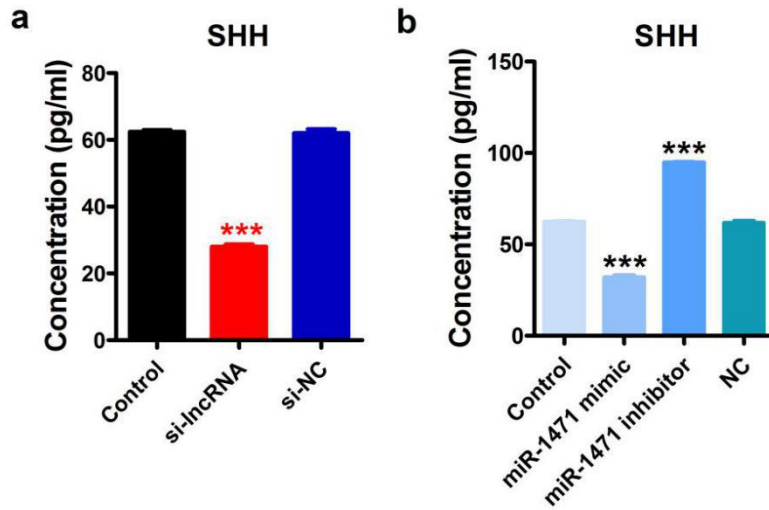

### Supplementary Fig. 4

Quantification and statistical analysis of the SHH and Gli-1 immunostaining staining. n=3 batches of cells. The data are presented as the mean±S.E.M. \*\*\* $p$ <0.001 vs. Control.

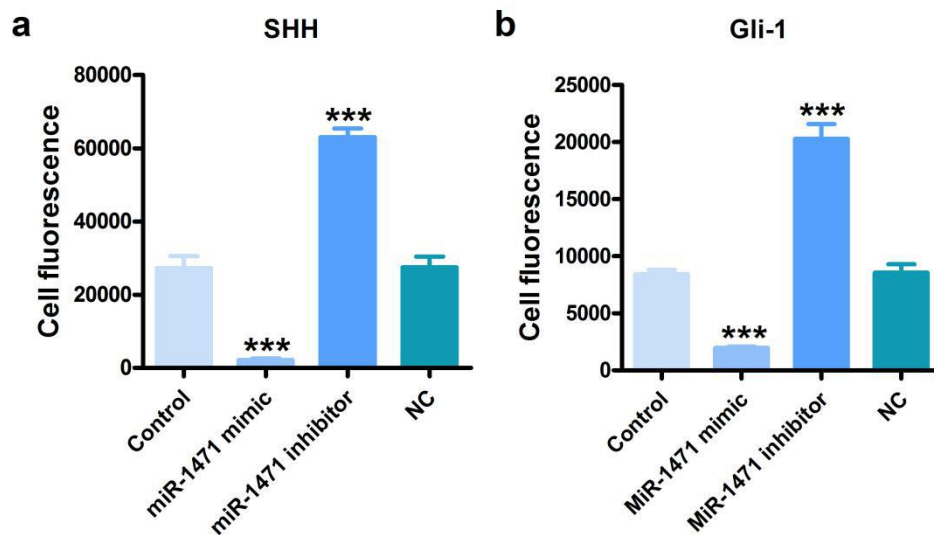

## Supplementary Fig. 5

Western blot analysis of E-cadherin, vimentin and  $\alpha$ -SMA protein levels. n=3 batches of cells. The data are presented as the mean $\pm$ S.E.M. \* $p < 0.05$  \*\* $p < 0.01$  \*\*\* $p < 0.001$  vs. Control.

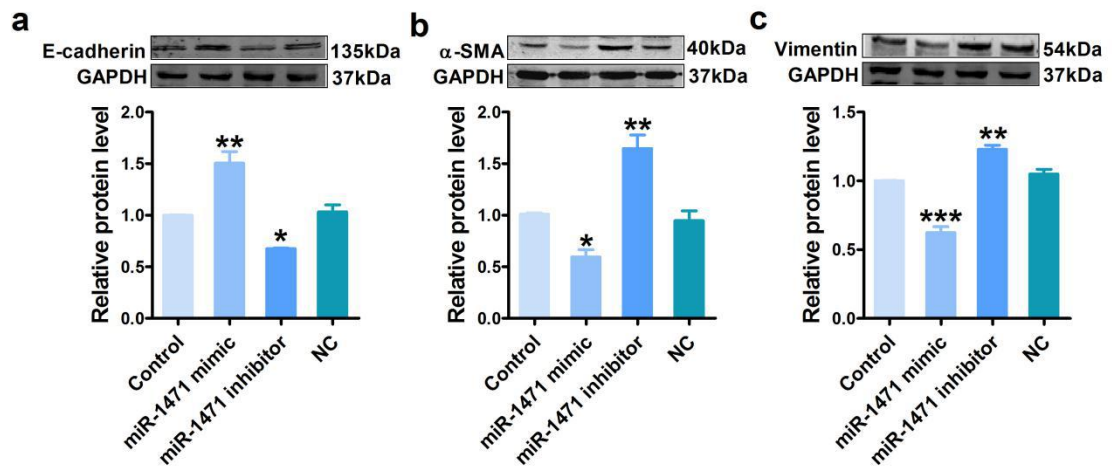

Supplement: Supplementary file 1 [file 12480977]
